# Supplementary figures and images for: Strong spin–orbit coupling effect induced large valley splitting in Janus MSeXH (M = Cr, Mo, and W; X = N and P)
Source: Royal Society of Chemistry journal article supplement (doi:10.1039/d4cp04746j), 2025-01-01

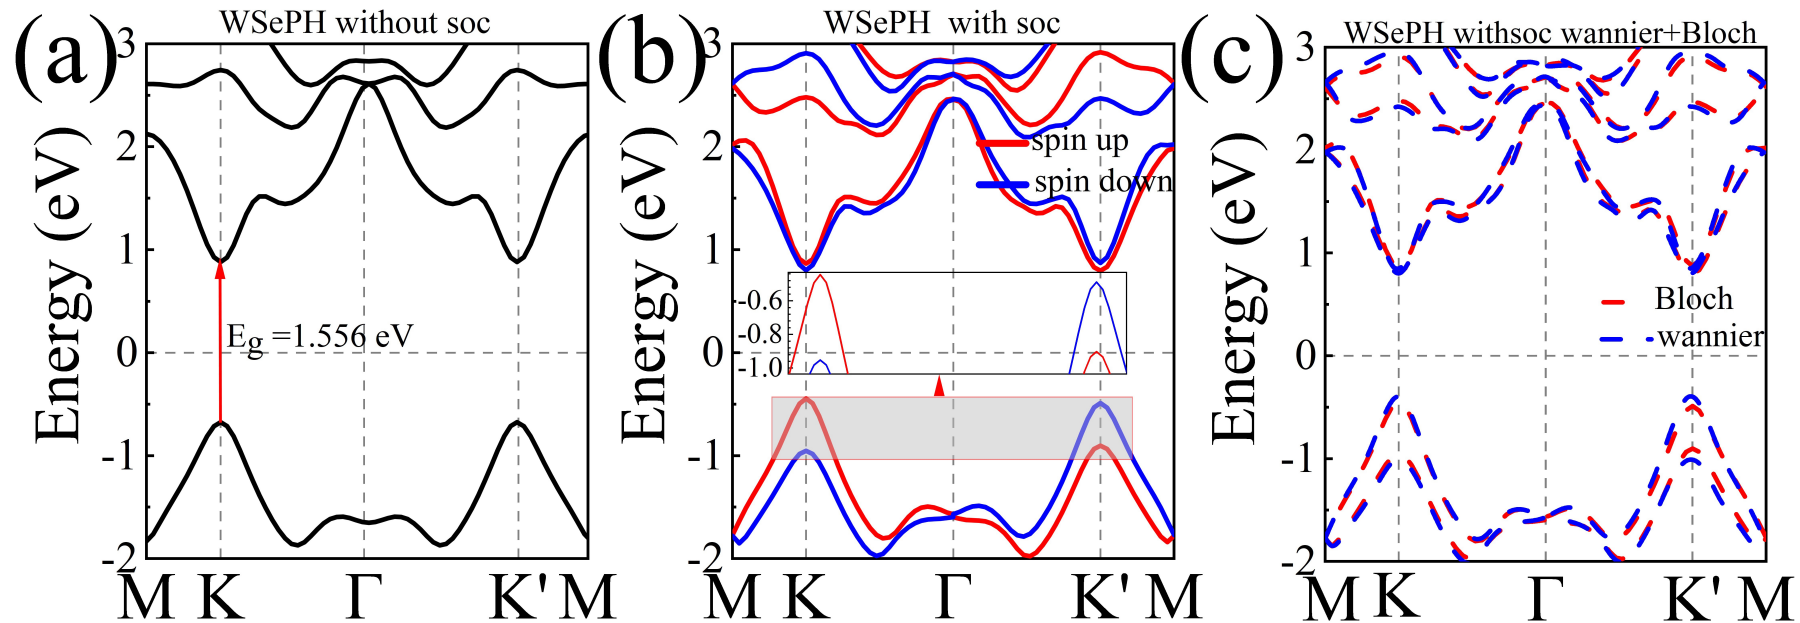

Supplement: d4cp04746j12.pdf [file d4cp04746j12.pdf]

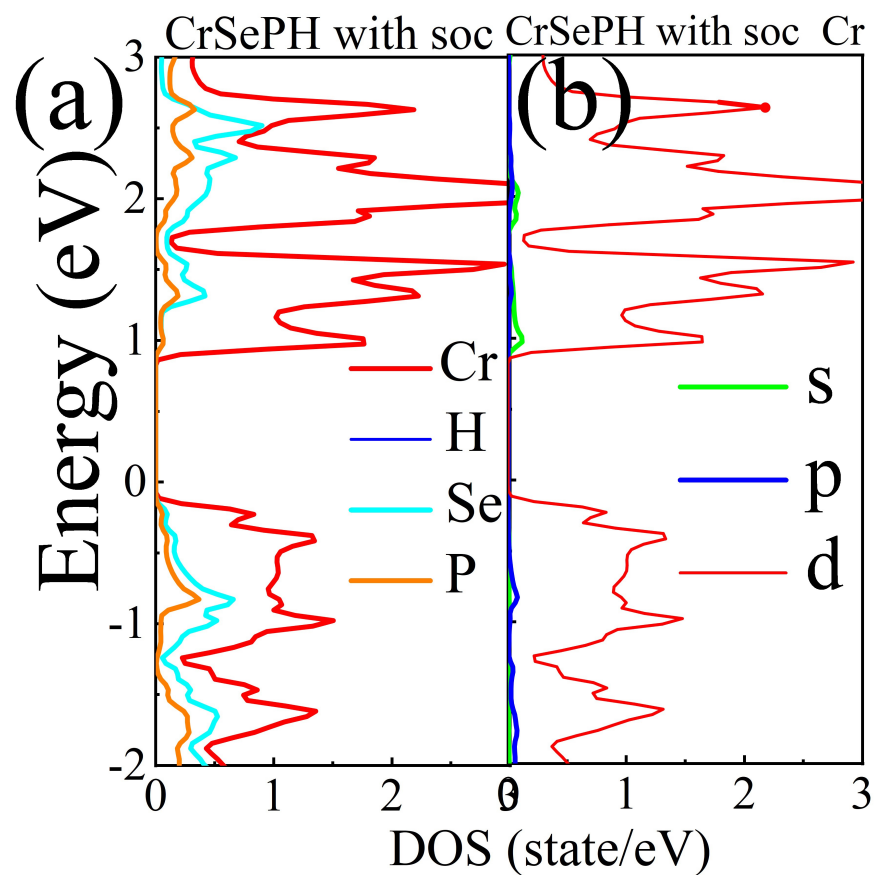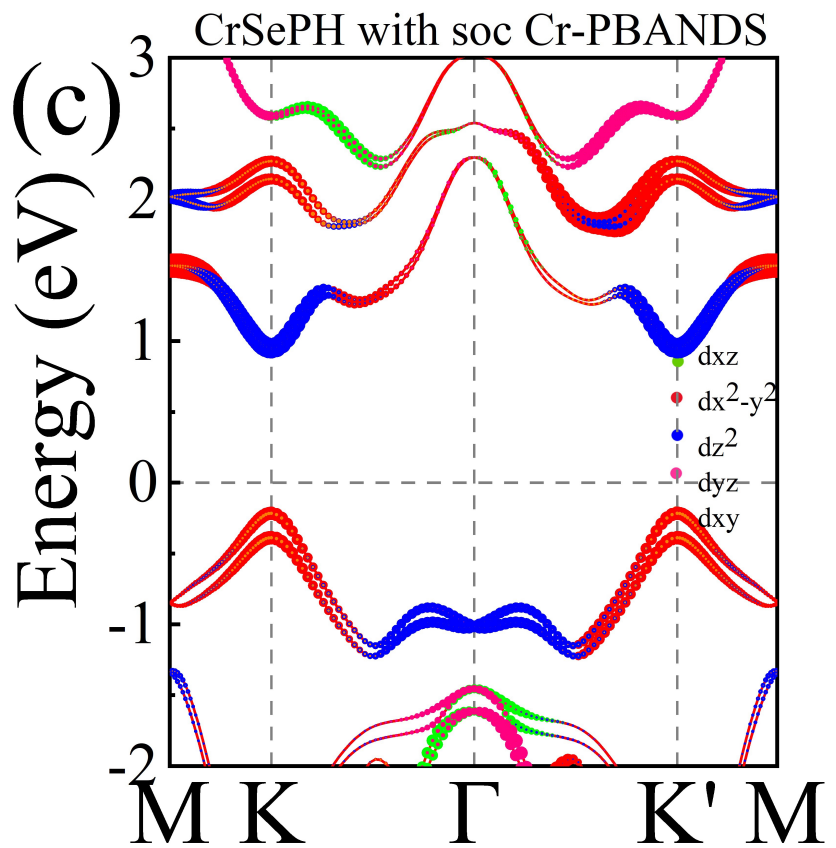

Supplement: d4cp04746j14.pdf [file d4cp04746j14.pdf]

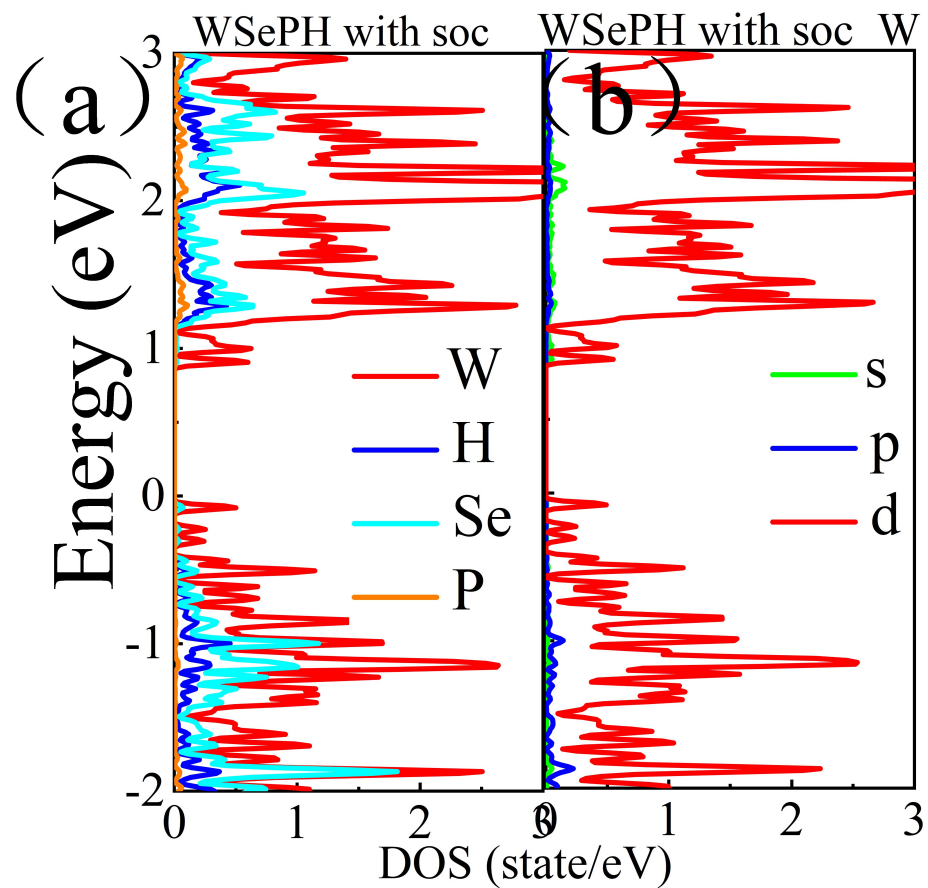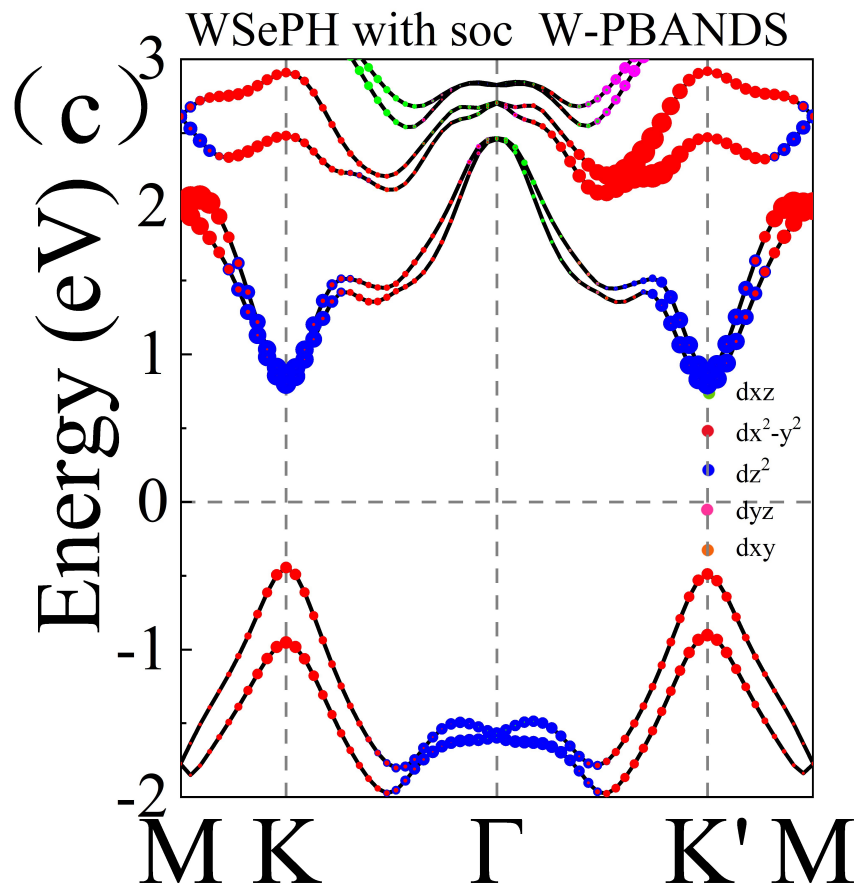

Supplement: d4cp04746j3.pdf [file d4cp04746j3.pdf]

WSePH with soc — spin up — spin down

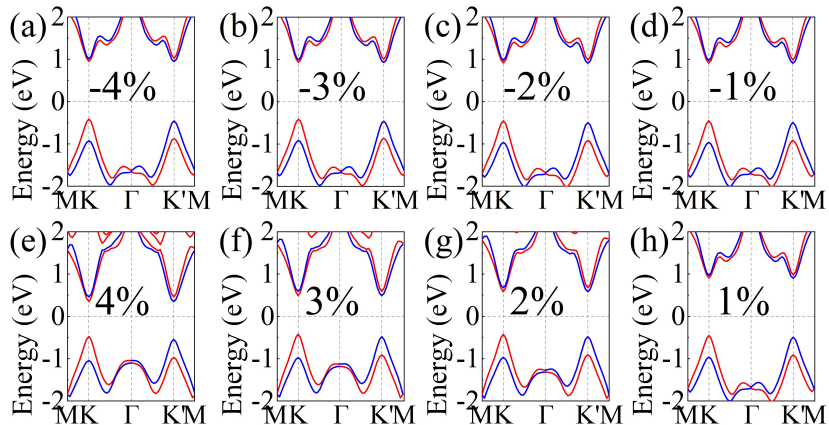

Supplement: d4cp04746j7.pdf [file d4cp04746j7.pdf]
